# Supplementary material for: Laboratory Evaluation of Low-Cost Optical Particle Counters for Environmental and Occupational Exposures
Source: MDPI journal article supplement (doi:10.3390/s21124146), 2021-06-17
Supplement: s1 [file sensors-1253009-supplementary.pdf › sensors-1253009-supplementary.pdf]

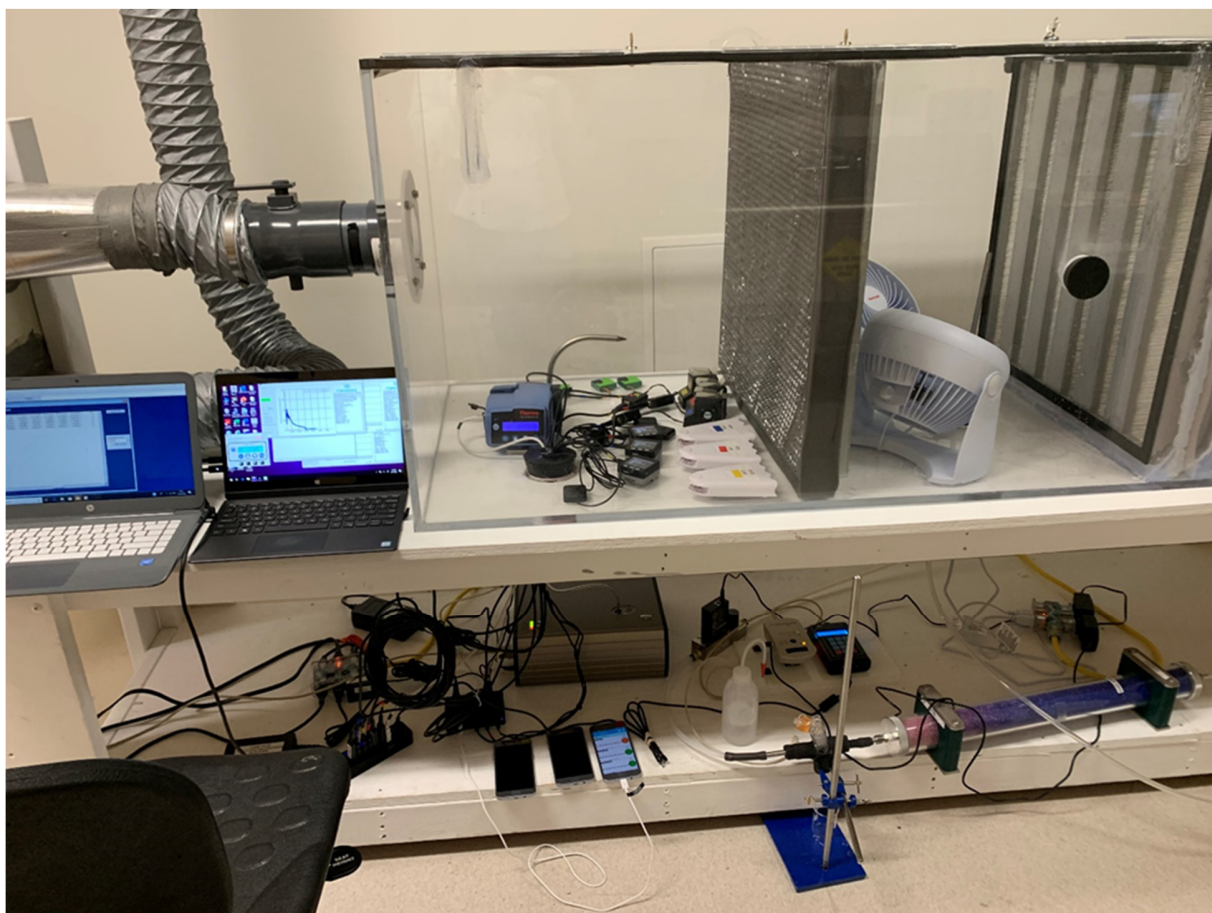

**Figure S1:** Photo of the experimental setup inside the Aerosol Research Laboratory at East Carolina University.

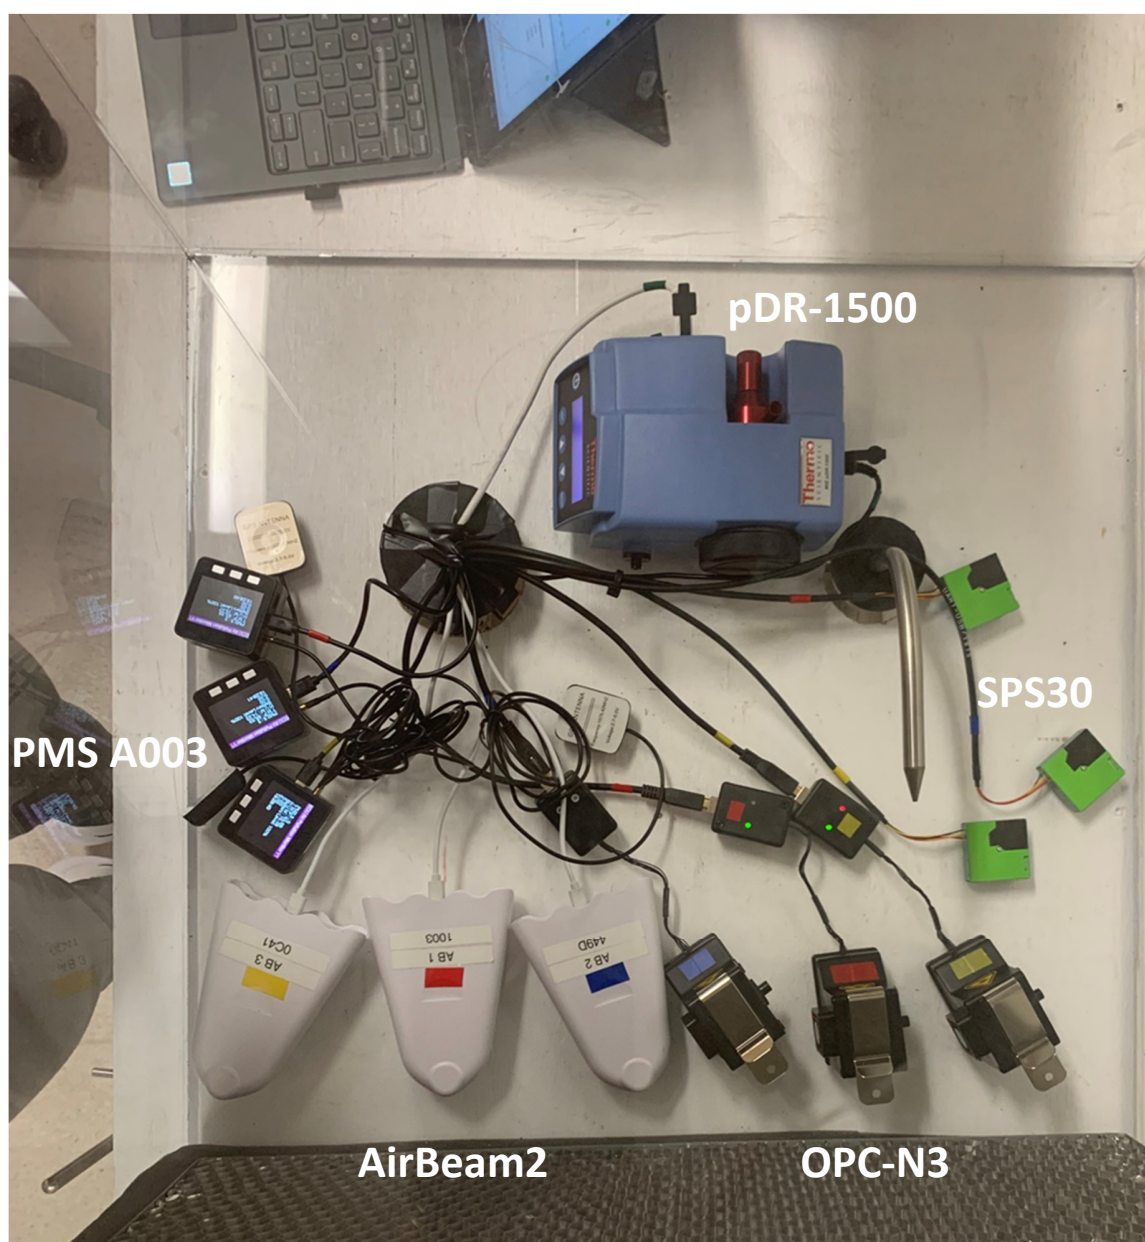

**Figure S2:** Photo of the low-cost sensors inside the sampling zone of the chamber.

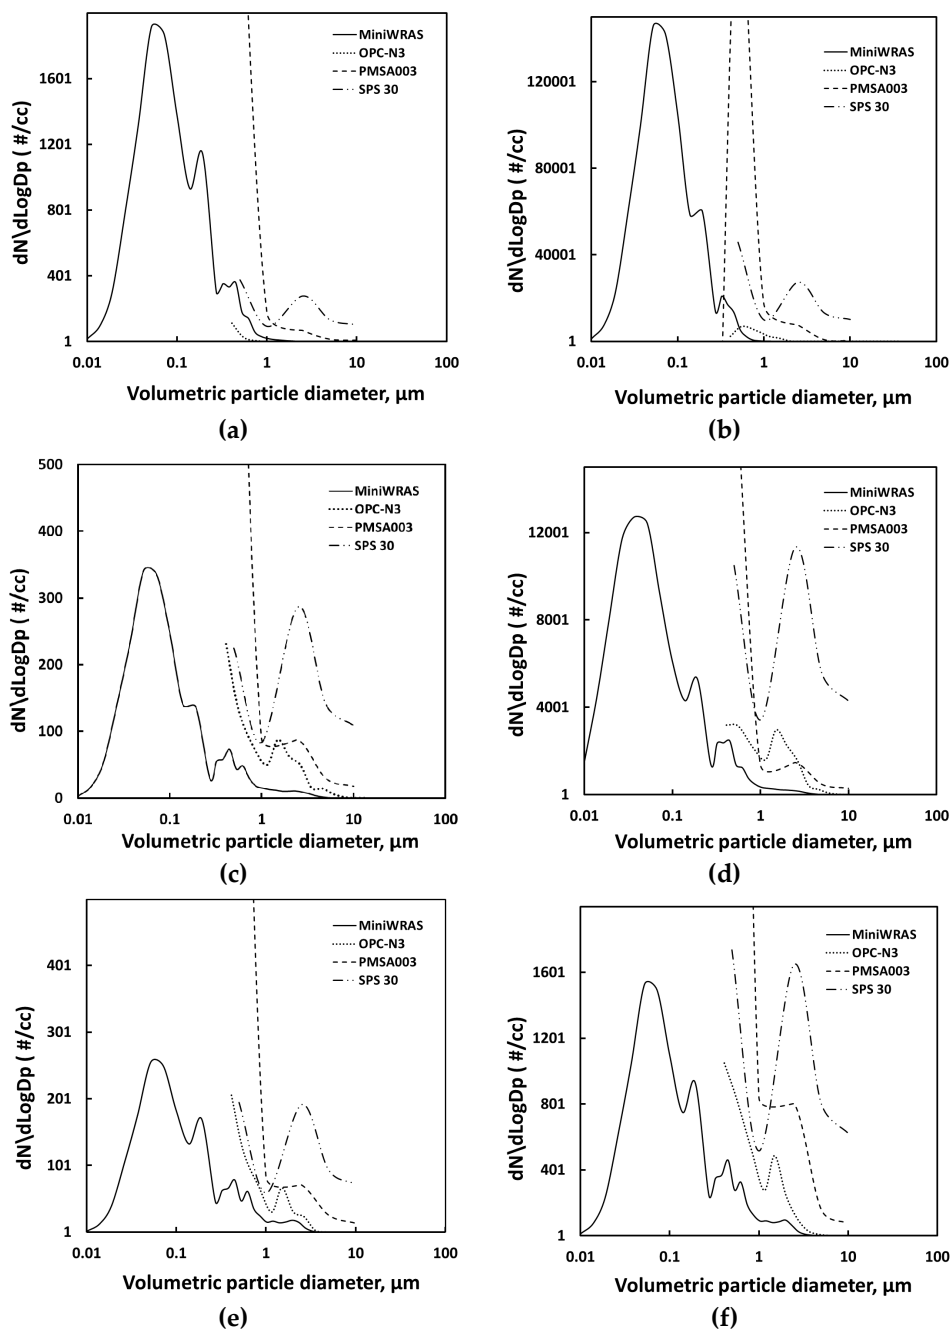

**Figure S3:** Particle number concentration for low-cost sensors and the reference instrument for (a, b) salt, (c, d) ARD, and (e, f) PAO-4 oil (environmental and occupational settings, respectively).
